# Supplementary material for: Improved access and care through the implementation of virtual Hallway, a consultation platform in Nova Scotia: preliminary findings from a feasibility evaluation
Source: PubMed Central journal article supplement (PMC11488209; doi:10.1186/s43058-024-00651-3), 2024-10-18
Supplement: 43058_2024_651_MOESM2_ESM.pdf [file 43058_2024_651_MOESM2_ESM.pdf]

Book a Consult ? +

**Choose the Date and Time of your Appointment**  
After selecting the date, choose from the available hours that day, then confirm.

August 2024

|    |    |    |    |    |    |    |
|----|----|----|----|----|----|----|
| S  | M  | T  | W  | T  | F  | S  |
|    |    |    |    | 1  | 2  | 3  |
| 4  | 5  | 6  | 7  | 8  | 9  | 10 |
| 11 | 12 | 13 | 14 | 15 | 16 | 17 |
| 18 | 19 | 20 | 21 | 22 | 23 | 24 |
| 25 | 26 | 27 | 28 | 29 | 30 | 31 |

Pick Appointment Time For August 12  
Times in Atlantic Daylight Time

8:00am 8:15am 8:30am

Back

VirtualHallway

Book a Consult ? +

STEP 1 Select Specialty STEP 2 Select a Specialist STEP 3 Select a Date/Time STEP 4 Consult Form

**Select a Specialty** ?  
Choose a Specialty below to view availability

Search Specialties

All Specialties

|                                                                                                                           |                                                                                                           |                                                                                                                                    |
|---------------------------------------------------------------------------------------------------------------------------|-----------------------------------------------------------------------------------------------------------|------------------------------------------------------------------------------------------------------------------------------------|
| <b>Addictions Medicine</b> 1<br>Next Availability: Thu July 25 • 5:45pm<br>Book Next Availability View All Availabilities | <b>Anesthesiology</b><br>Fully Booked<br>Get Notified when Available                                      | <b>Child/Adolescent Psychiatry</b> 1<br>Next Availability: Wed July 31 • 11:00am<br>Book Next Availability View All Availabilities |
| <b>Dermatology</b><br>Fully Booked<br>Get Notified when Available                                                         | <b>ENT</b> 2<br>Next Availability: Fri July 19 • 4:25pm<br>Book Next Availability View All Availabilities | <b>Endocrinology</b> 2<br>Next Availability: Fri August 30 • 11:00am<br>Book Next Availability View All Availabilities             |
| <b>Gastroenterology</b>                                                                                                   | <b>General Surgery</b> 5                                                                                  | <b>Geriatric Medicine</b>                                                                                                          |

VirtualHallway
